# Supplementary material for: Genetic features and phylogenetic relationship analyses of Guizhou Han population residing in Southwest China via 38 X-InDels
Source: PeerJ. 2023 Mar 8;11:e14964. doi: 10.7717/peerj.14964 (PMC10007965; doi:10.7717/peerj.14964)
Supplement: Supplemental Information 2 [file peerj-11-14964-s002.xlsx]

## Sheet: Table S2
Table S2. Allele frequencies of 38 X-InDels in Guizhou Han population.
Allele	rs3859989	rs57608175-female	rs57608175-male	rs4030406	rs3216913	rs2308280	rs59605609	rs56820033
INS	0.4132	0.383	0.25	0.5943	0.5642	0.4679	0.5038	0.5547
DEL	0.5868	0.617	0.75	0.4057	0.4358	0.5321	0.4962	0.4453
Allele	rs143123845	rs10699224	rs1160845	rs2308033	rs57843641	rs3077884	rs11277082	rs71671860
INS	0.5604	0.6396	0.9491	0.8547	0.5509	0.7245	0.9642	0.3977
DEL	0.4396	0.3604	0.0509	0.1453	0.4491	0.2755	0.0358	0.6023
Allele	rs58595330	rs16637	rs36094418	rs17394	rs2307707	rs16368	rs3215490	rs60283667
INS	0.4186	0.2538	0.5777	0.7064	0.5152	0.0095	0.5455	0.6439
DEL	0.5814	0.7462	0.4223	0.2936	0.4848	0.9905	0.4545	0.3561
Allele	rs79829945	rs16397	rs61260787	rs2307741	rs25581
INS	0.5887	0.3396	0.5906	0.2019	0.1642
DEL	0.4113	0.6604	0.4094	0.7981	0.8358
Allele	rs35574346	rs34763847	rs149102585	rs16367	rs10671504
INS	0.9167	0.6004	0.5701	0.3807	0.5852
DEL	0.0833	0.3996	0.4299	0.6193	0.4148
Allele	rs3048996	rs35954471	rs363794	rs45449991	rs199731653
INS	0.767	0.5758	0.6061	0.2955	0.3011
DEL	0.233	0.4242	0.3939	0.7045	0.6989
