# Supplementary material for: Genetic features and phylogenetic relationship analyses of Guizhou Han population residing in Southwest China via 38 X-InDels
Source: PeerJ. 2023 Mar 8;11:e14964. doi: 10.7717/peerj.14964 (PMC10007965; doi:10.7717/peerj.14964)
Supplement: Supplemental Information 3 [file peerj-11-14964-s003.xlsx]

## Sheet: Table S3
Table S3. Analysis of Hardy-Weinberg test of 38 X-InDel loci.
Loci	rs3859989	rs57608175	rs4030406	rs3216913	rs2308280	rs59605609	rs56820033	rs79829945	rs16397	rs61260787
Hardy-Weinberg test (p-value)	0.5137	0.7883	0.4394	0.9989	0.1012	0.4958	0.0011	0.6011	0.9743	0.5137
Loci	rs71671860	rs35574346	rs34763847	rs149102585	rs16367	rs10671504	rs58595330	rs16637	rs36094418	rs17394
Hardy-Weinberg test (p-value)	0.928	0.6271	0.3694	0.9946	0.6848	0.9637	0.4863	0.1565	0.4394	0.6867
Loci	rs2307741	rs25581	rs143123845	rs10699224	rs1160845	rs2308033	rs57843641	rs3077884	rs11277082
Hardy-Weinberg test (p-value)	0.5318	0.9383	0.9398	0.9355	1.0000	0.8334	0.9188	0.7598	1.0000
Loci	rs2307707	rs16368	rs3215490	rs60283667	rs3048996	rs35954471	rs363794	rs45449991	rs199731653
Hardy-Weinberg test (p-value)	0.6908	1.0000	0.8986	0.1566	0.9495	0.4653	0.8808	0.0042	0.7425
