# Supplementary material for: Genetic features and phylogenetic relationship analyses of Guizhou Han population residing in Southwest China via 38 X-InDels
Source: PeerJ. 2023 Mar 8;11:e14964. doi: 10.7717/peerj.14964 (PMC10007965; doi:10.7717/peerj.14964)
Supplement: Supplemental Information 4 [file peerj-11-14964-s004.xlsx]

## Sheet: Table S4
Table S4. Analysis of forensic statistic parameters of 32 X-InDels and three linkage blocks in the Guizhou Han population.
Loci	He	PD_Male	PD_Female	MEC_Desmarais	MEC_Desmarais_duo
rs57608175	0.431025	0.430212	0.5828	0.337671	0.215106
rs4030406	0.483127	0.482215	0.615633	0.365949	0.241108
rs2308280	0.49888	0.497939	0.623963	0.373967	0.24897
rs59605609	0.500916	0.499971	0.624986	0.374986	0.249986
rs56820033	0.49495	0.494016	0.621954	0.37199	0.247008
rs16397	0.449392	0.448544	0.5953	0.347948	0.224272
rs2307741	0.322882	0.322273	0.488756	0.270343	0.161136
rs25581	0.274996	0.274477	0.435947	0.236808	0.137238
rs143123845	0.493635	0.492704	0.621272	0.371325	0.246352
rs1160845	0.096801	0.0966184	0.179234	0.0919508	0.0483092
rs2308033	0.248845	0.248376	0.404216	0.217531	0.124188
rs57843641	0.495754	0.494818	0.622369	0.372396	0.247409
rs3077884	0.399954	0.399199	0.559359	0.319519	0.1996
rs11277082	0.0691672	0.0690367	0.130924	0.0666537	0.0345184
rs71671860	0.479978	0.479069	0.613878	0.364316	0.239535
rs35574346	0.153012	0.152722	0.270458	0.14106	0.0763611
rs34763847	0.48075	0.47984	0.61431	0.364717	0.23992
rs149102585	0.491102	0.490172	0.619941	0.370038	0.245086
rs16367	0.47243	0.471535	0.609552	0.360362	0.235768
rs10671504	0.486403	0.485482	0.617425	0.367636	0.242741
rs58595330	0.487672	0.486748	0.618111	0.368286	0.243374
rs16637	0.37949	0.378771	0.542341	0.307037	0.189386
rs17394	0.415585	0.414798	0.57151	0.328769	0.207399
rs2307707	0.500486	0.499538	0.624769	0.374769	0.249769
rs16368	0.0188552	0.0188195	0.0371077	0.0186424	0.00940975
rs3215490	0.4968	0.49586	0.622904	0.372921	0.24793
rs60283667	0.459456	0.458586	0.60172	0.353435	0.229293
rs3048996	0.3581	0.357422	0.523218	0.293547	0.178711
rs35954471	0.489436	0.488509	0.619056	0.369188	0.244254
rs363794	0.478392	0.477486	0.612982	0.363489	0.238743
rs45449991	0.41715	0.416359	0.572686	0.329682	0.20818
rs10699224-rs3216913	0.546755	0.542735	0.699117	0.450943	0.312984
rs36094418-rs79829945	0.571534	0.567331	0.728411	0.482945	0.342249
rs3859989-rs61260787	0.496572	0.492921	0.628368	0.378418	0.251697
rs199731653	0.421676	0.420878	0.576048	0.332309	0.210439
Combined	-	1	1	0.999999	0.999747
